# Supplementary material for: Effect of the cobalt and zinc ratio on the preparation of zeolitic imidazole frameworks (ZIFs): synthesis, characterization and supercapacitor applications
Source: Royal Society of Chemistry journal article supplement (doi:10.1039/c9dt03306h), 2019-01-01
Supplement: c9dt03306h1.pdf [file c9dt03306h1.pdf]

## Effect of Cobalt and Zinc ratio on the Preparation of Zeolitic Imidazole Framework (ZIF): Synthesis, Characterization and Supercapacitor Application

Ha Dong Chul, Rajangam Vinodh\*, Chandu V. V. Muralee Gopi,  
Chinnadurai Deviprasath, Hee-Je Kim\*, Moonsuk Yi

### Supplementary Information

Fig. S1  
Pore size

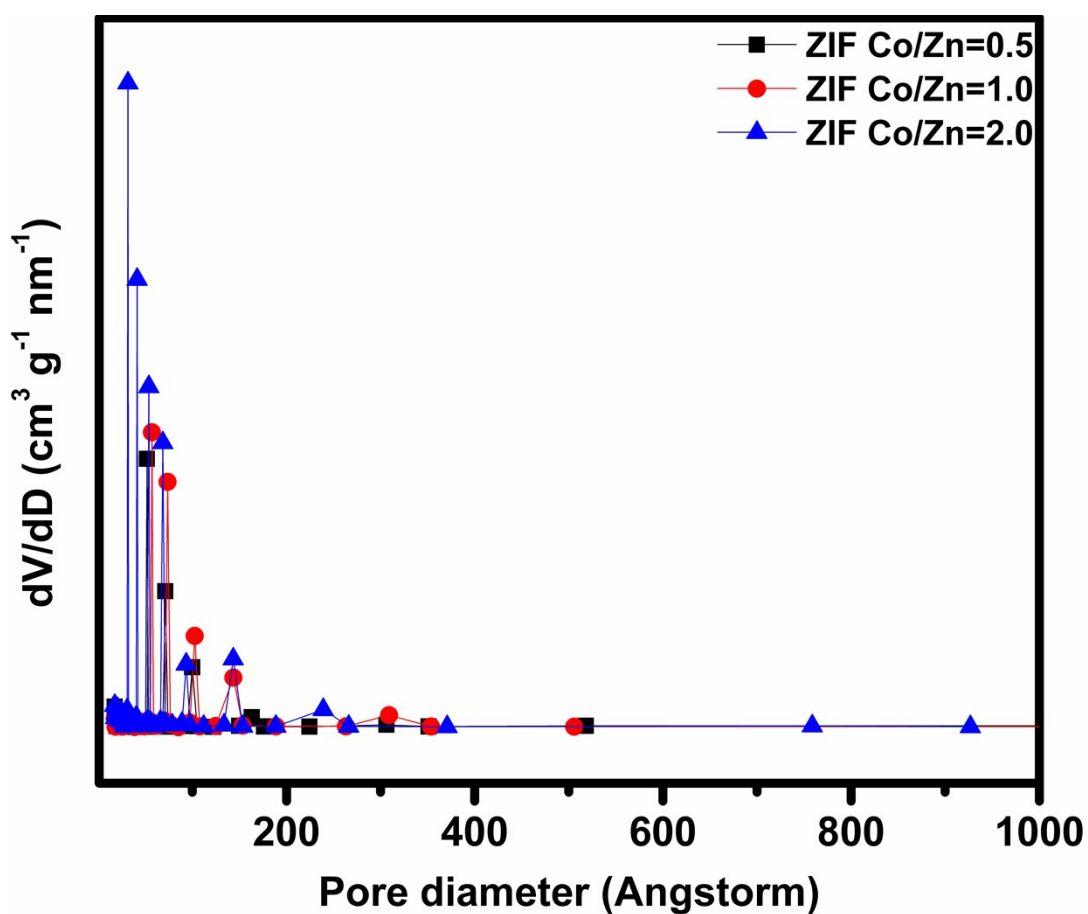

distribution curve of Co/Zn ZIFs.

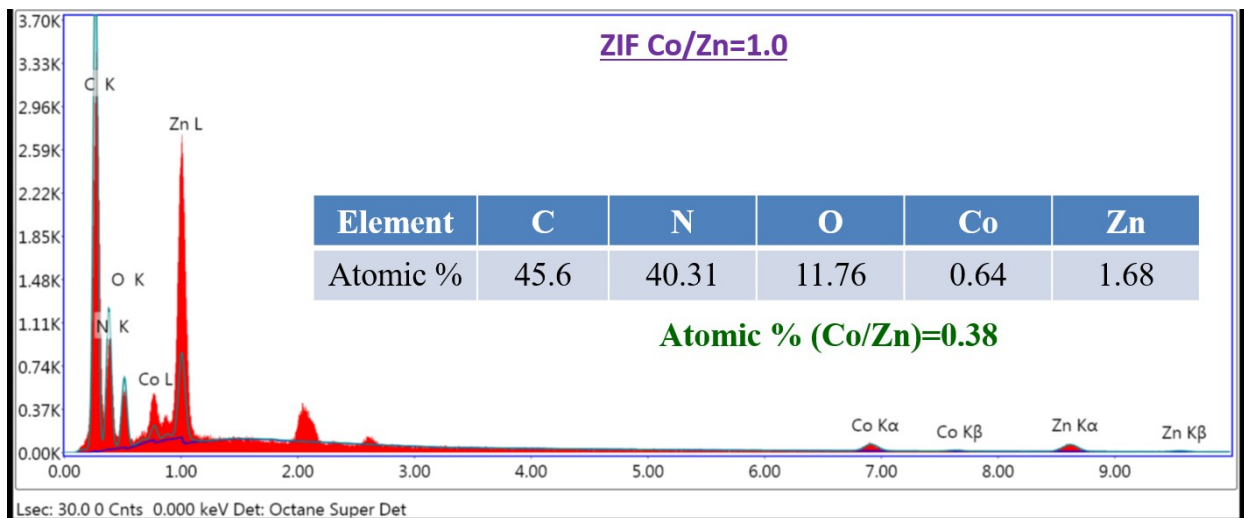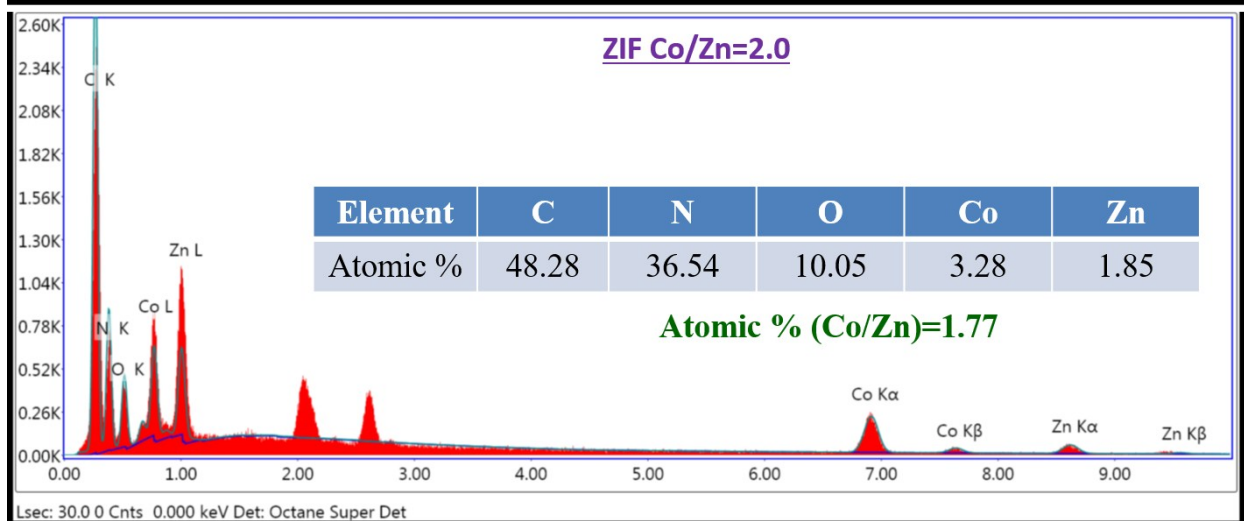

**Fig. S2** EDAX spectra of ZIF Co/Zn=1.0 and ZIF Co/Zn=2.0
